# Supplementary material for: Evolutionary Insights into Premetazoan Functions of the Neuronal Protein Homer
Source: PubMed Central journal article supplement — Mol Biol Evol. 2014 Jun 3;31(9):2342–55. doi: 10.1093/molbev/msu178 (PMC4137706; doi:10.1093/molbev/msu178), 2014-06-03

**Table S1**

| Name                  | Species                               | Accession number     | Domain Architecture |
|-----------------------|---------------------------------------|----------------------|---------------------|
| <u>Syntaxin1</u>      |                                       |                      |                     |
|                       | <i>Homo sapiens</i>                   | NP_004594.1          |                     |
|                       | <i>Mus musculus</i>                   | NP_058081.2          |                     |
|                       | <i>Strongylocentrotus purpuratus</i>  | NP_999785.1          |                     |
|                       | <i>Drosophila melanogaster</i>        | NP_524475.1          |                     |
|                       | <i>Caenorhabditis elegans</i>         | NP_001022614.1       |                     |
|                       | <i>Nematostella vectensis</i>         | XP_001629417.1       |                     |
|                       | <i>Trichoplax adhaerens</i>           | XP_002115196.1       |                     |
|                       | <i>Oscarella carmela</i>              | g5158.t1 (Compagen)  |                     |
|                       | <i>Amphimedon queenslandica</i>       | XP_003388239.1       |                     |
|                       | <i>Salpingoeca rosetta</i>            | XP_004991322.1       |                     |
|                       | <i>Monosiga brevicollis</i>           | XP_001743911.1       |                     |
|                       | <i>Capsaspora owczarzaki</i>          | XP_004344243.1       |                     |
|                       | <i>Rhizopus oryzae</i>                | EIE84042.1           |                     |
|                       | <i>Batrachochytrium dendrobatidis</i> | EGF79952.1           |                     |
|                       | <i>Saccharomyces cerevisiae</i>       | EGA56453.1           |                     |
| <u>SNAP-25</u>        |                                       |                      |                     |
|                       | <i>Homo sapiens</i>                   | NP_570824.1          |                     |
|                       | <i>Mus musculus</i>                   | NP_035558.1          |                     |
|                       | <i>Strongylocentrotus purpuratus</i>  | NP_999754.1          |                     |
|                       | <i>Drosophila melanogaster</i>        | NP_001036641.1       |                     |
|                       | <i>Caenorhabditis elegans</i>         | NP_505641.2          |                     |
|                       | <i>Nematostella vectensis</i>         | XP_001635030.1       |                     |
|                       | <i>Trichoplax adhaerens</i>           | XP_002107866.1       |                     |
|                       | <i>Oscarella carmela</i>              | g9602.t1 (Compagen)  |                     |
|                       | <i>Amphimedon queenslandica</i>       | XP_003388483.1       |                     |
|                       | <i>Salpingoeca rosetta</i>            | XP_004990098.1       |                     |
|                       | <i>Monosiga brevicollis</i>           | XP_001743132         |                     |
|                       | <i>Capsaspora owczarzaki</i>          | XP_004348618.1       |                     |
|                       | <i>Rhizopus oryzae</i>                | EIE91809.1           |                     |
|                       | <i>Batrachochytrium dendrobatidis</i> | EGF82656.1           |                     |
|                       | <i>Saccharomyces cerevisiae</i>       | NP_011523.3          |                     |
| <u>Synaptobrevin2</u> |                                       |                      |                     |
|                       | <i>Homo sapiens</i>                   | NP_055047.2          |                     |
|                       | <i>Mus musculus</i>                   | NP_033523.1          |                     |
|                       | <i>Strongylocentrotus purpuratus</i>  | NP_999795.1          |                     |
|                       | <i>Drosophila melanogaster</i>        | NP_001261269.1       |                     |
|                       | <i>Caenorhabditis elegans</i>         | NP_504688.1          |                     |
|                       | <i>Nematostella vectensis</i>         | XP_001634446.1       |                     |
|                       | <i>Trichoplax adhaerens</i>           | XP_002113403.1       |                     |
|                       | <i>Oscarella carmela</i>              | g10105.t1 (Compagen) |                     |
|                       | <i>Amphimedon queenslandica</i>       | XP_003387152.1       |                     |
|                       | <i>Salpingoeca rosetta</i>            | XP_004998346.1       |                     |
|                       | <i>Monosiga brevicollis</i>           | XP_001744447.1       |                     |

*Capsaspora owczarzaki*  
*Rhizopus oryzae*  
*Batrachochytrium dendrobatidis*  
*Saccharomyces cerevisiae*

XP\_004345740.1  
 EIE76199.1  
 EGF81495.1  
 NP\_014972.3

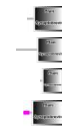

Sec1/Munc18

*Homo sapiens*  
*Mus musculus*  
*Strongylocentrotus purpuratus*  
*Drosophila melanogaster*  
*Caenorhabditis elegans*  
*Nematostella vectensis*  
*Trichoplax adhaerens*  
*Oscarella carmela*  
*Amphimedon queenslandica*  
*Salpingoeca rosetta*  
*Monosiga brevicollis*  
*Capsaspora owczarzaki*  
*Rhizopus oryzae*  
*Batrachochytrium dendrobatidis*  
*Saccharomyces cerevisiae*

NP\_003156.1  
 NP\_001107041.1  
 NP\_999834.1  
 NP\_523916.2  
 NP\_001024606.1  
 XP\_001635431.1  
 XP\_002109999.1  
 g9363.t1 (Compagen)  
 XP\_003385042.1  
 XP\_004993080.1  
 XP\_001746141  
 XP\_004348283.1  
 EIE78827.1  
 EGF80549.1  
 EDN60502.1

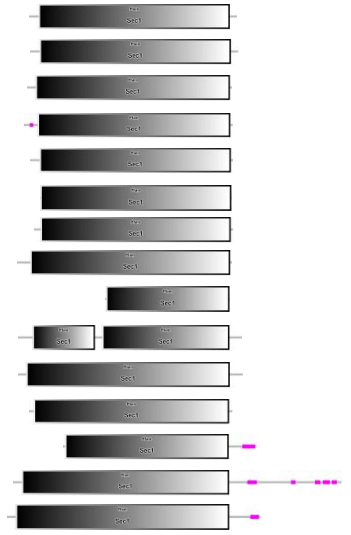

Tomosyn

*Homo sapiens*  
*Mus musculus*  
*Strongylocentrotus purpuratus*  
*Drosophila melanogaster*  
*Caenorhabditis elegans*  
*Nematostella vectensis*  
*Trichoplax adhaerens*  
*Oscarella carmela*  
*Amphimedon queenslandica*  
*Monosiga brevicollis*  
*Capsaspora owczarzaki*  
*Rhizopus oryzae*  
*Saccharomyces cerevisiae*

NP\_640337.3  
 NP\_001074813  
 XP\_785653.3  
 NP\_001245644.1  
 NP\_491623.3  
 XP\_001640099.1  
 XP\_002112359.1  
 g8759.t1 (Compagen)  
 XP\_003388719.1  
 XP\_001743265.1  
 EFW43436.2  
 EIE89460.1  
 NP\_015357.1

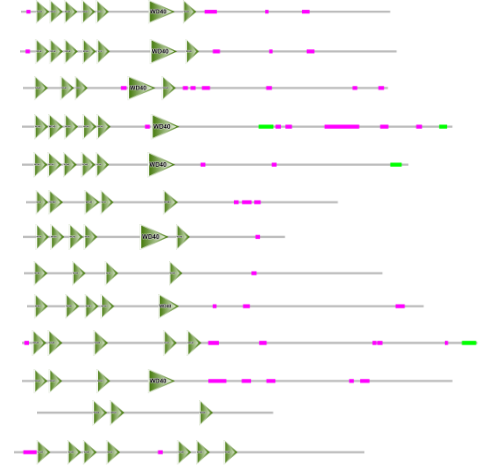

Synaptogyrin

*Homo sapiens*  
*Mus musculus*  
*Strongylocentrotus purpuratus*  
*Drosophila melanogaster*  
*Caenorhabditis elegans*  
*Trichoplax adhaerens*  
*Oscarella carmela*  
*Amphimedon queenslandica*  
*Salpingoeca rosetta*  
*Monosiga brevicollis*  
*Capsaspora owczarzaki*

NP\_004702.2  
 NP\_997591.1  
 XP\_001177627.1  
 NP\_610908.1  
 NP\_509239.1  
 XP\_002113114.1  
 g1016.t1 (Compagen)  
 XP\_003386894.1  
 XP\_004989169.1  
 XP\_001749438.1  
 XP\_004342699.1

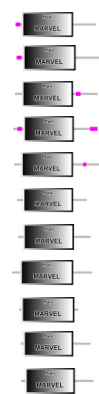

Complexin

*Homo sapiens*  
*Mus musculus*

NP\_006642.1  
 NP\_031782.3

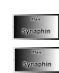

*Strongylocentrotus purpuratus* XP\_001199120.1  
*Drosophila melanogaster* NP\_525019.2  
*Caenorhabditis elegans* NP\_490868.1  
*Nematostella vectensis* XP\_001627218.1  
*Trichoplax adhaerens* XP\_002116780.1  
*Oscarella carmela* g1637.t1 (Compagen)  
*Amphimedon queenslandica* XP\_003388526.1  
*Monosiga brevicollis* XP\_001747888.1  
*Capsaspora owczarzaki* XP\_004364368.1

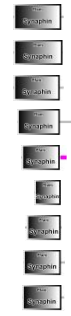

SV2

*Homo sapiens* NP\_055664.3  
*Mus musculus* NP\_071313.1  
*Strongylocentrotus purpuratus* XP\_787750.2  
*Drosophila melanogaster* NP\_572345.1  
*Caenorhabditis elegans* NP\_498960.2  
*Nematostella vectensis* XP\_001633415.1  
*Trichoplax adhaerens* XP\_002107649.1  
*Oscarella carmela* g5198.t1 (Compagen)  
*Amphimedon queenslandica* XP\_003386333.1  
*Salpingoeca rosetta* XP\_004990136.1  
*Monosiga brevicollis* XP\_001750795.1

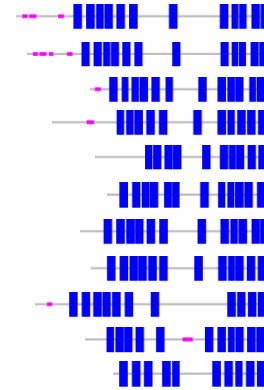

Munc13

*Homo sapiens* NP\_006368.3  
*Mus musculus* NP\_001074882.1  
*Strongylocentrotus purpuratus* XP\_001178339.1  
*Drosophila melanogaster* NP\_651949.2  
*Caenorhabditis elegans* NP\_001021874.1  
*Trichoplax adhaerens* XP\_002110349.1  
*Oscarella carmela* g1977.t1 (Compagen)  
*Amphimedon queenslandica* XP\_003389150.1

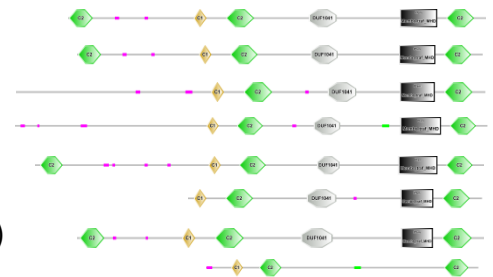

Synaptophysin

*Homo sapiens* NP\_003170.1  
*Mus musculus* NP\_033331.2  
*Strongylocentrotus purpuratus* XP\_001175610.1  
*Caenorhabditis elegans* NP\_501360.2  
*Nematostella vectensis* XP\_001636455.1  
*Trichoplax adhaerens* XP\_002118614.1  
*Oscarella carmela* g572.t1 (Compagen)  
*Amphimedon queenslandica* XP\_003384953.1  
*Capsaspora owczarzaki* XP\_004342419.1

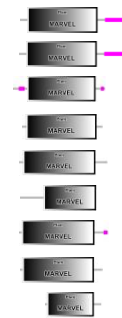

CAPS

*Homo sapiens* NP\_003707.2  
*Mus musculus* NP\_001036082.1  
*Strongylocentrotus purpuratus* XP\_785306.2  
*Drosophila melanogaster* NP\_001027031.1  
*Caenorhabditis elegans* NP\_502437.3  
*Nematostella vectensis* XP\_001637484.1  
*Trichoplax adhaerens* XP\_002111376.1  
*Oscarella carmela* g5696.t1 (Compagen)

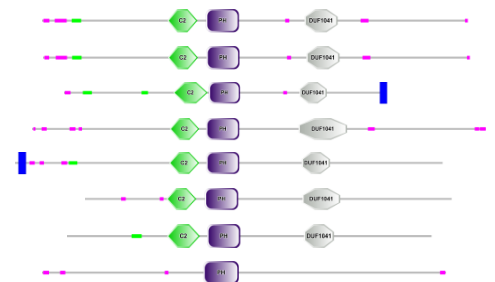

*Amphimedon queenslandica*

I1FTN5

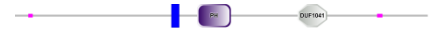

Synaptotagmin1

*Homo sapiens*

NP\_001129278.1

*Mus musculus*

NP\_033332.1

*Strongylocentrotus purpuratus*

NP\_001159462.1

*Drosophila melanogaster*

NP\_523460.2

*Caenorhabditis elegans*

NP\_001022129.1

*Nematostella vectensis*

XP\_001623846.1

*Trichoplax adhaerens*

XP\_002117742.1

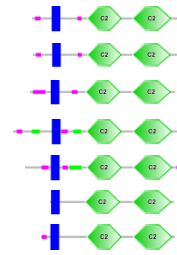

Rabphilin

*Homo sapiens*

NP\_055769.2

*Mus musculus*

NP\_035416.1

*Drosophila melanogaster*

NP\_572651.1

*Caenorhabditis elegans*

NP\_001022568.1

*Nematostella vectensis*

XP\_001633996.1

*Trichoplax adhaerens*

XP\_002115717.1

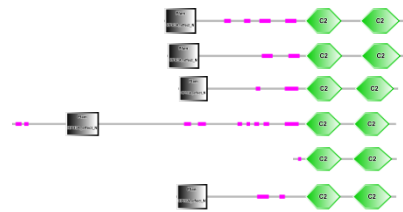

vGluT

*Homo sapiens*

NP\_064705.1

*Mus musculus*

NP\_892038.2

*Strongylocentrotus purpuratus*

XP\_786480.2

*Drosophila melanogaster*

NP\_608681.2

*Caenorhabditis elegans*

NP\_499023.3

*Nematostella vectensis*

XP\_001623804.1

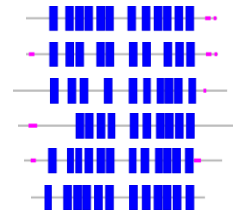

Synapsin

*Homo sapiens*

NP\_008881.2

*Mus musculus*

NP\_038708.3

*Strongylocentrotus purpuratus*

XP\_001195845.1

*Drosophila melanogaster*

NP\_731457.2

*Caenorhabditis elegans*

NP\_741326.1

*Nematostella vectensis*

XP\_001631589.1

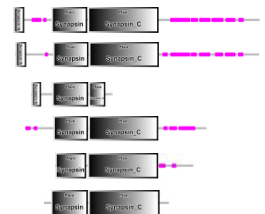

Doc2

*Homo sapiens*

NP\_003577.2

*Mus musculus*

NP\_034199.1

*Strongylocentrotus purpuratus*

XP\_790269.1

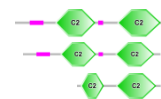

Spectrin

*Homo sapiens*

NP\_001182461.1

*Mus musculus*

NP\_001171139.1

*Strongylocentrotus purpuratus*

XP\_785949.2

*Drosophila melanogaster*

NP\_476739.1

*Caenorhabditis elegans*

NP\_508537.1

*Nematostella vectensis*

XP\_001618830.1

*Trichoplax adhaerens*

XP\_002115915.1

*Oscarella carmela*

g5067.t1 (Compagen)

*Amphimedon queenslandica*

XP\_003389115.1

*Salpingoeca rosetta*

XP\_004989969.1

*Monosiga brevicollis*

XP\_001743122.1

*Capsaspora owczarzaki*

XP\_004365313.1

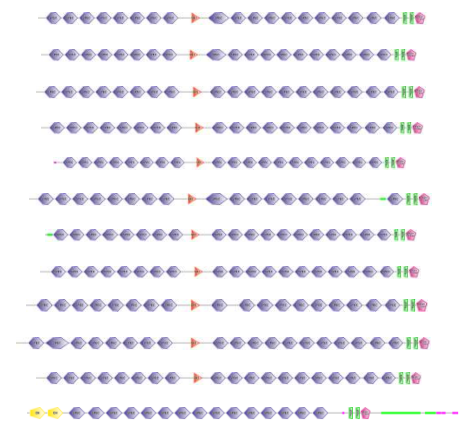

### RimBP

*Homo sapiens*

*Mus musculus*

*Strongylocentrotus purpuratus*

*Drosophila melanogaster*

*Caenorhabditis elegans*

*Nematostella vectensis*

*Trichoplax adhaerens*

*Oscarella carmela*

*Amphimedon queenslandica*

*Salpingoeca rosetta*

*Monosiga brevicollis*

XP\_005253619.1

NP\_001074857.1

XP\_001202010.1

NP\_732029.3

NP\_497459.2

Scaffold 97 (JGI)

XP\_002115365.1

g8108.t1 (Compagen)

XP\_003384147.1

XP\_004991976.1

XP\_001748571.1

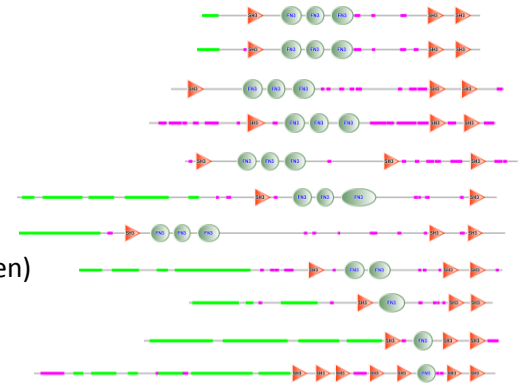

### CASKin

*Homo sapiens*

*Mus musculus*

*Strongylocentrotus purpuratus*

*Drosophila melanogaster*

*Caenorhabditis elegans*

*Nematostella vectensis*

*Trichoplax adhaerens*

*Oscarella carmela*

*Amphimedon queenslandica*

*Capsaspora owczarzaki*

NP\_065815.1

NP\_082213.2

XP\_795586.2

NP\_651143.2

NP\_509620.2

XP\_001640093.1

XP\_002109164.1

g6502.t1 (Compagen)

XP\_003382820.1

XP\_004346118.1

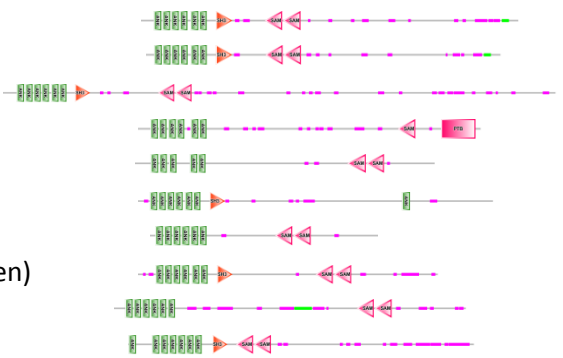

### Mint

*Homo sapiens*

*Mus musculus*

*Strongylocentrotus purpuratus*

*Drosophila melanogaster*

*Caenorhabditis elegans*

*Nematostella vectensis*

*Trichoplax adhaerens*

*Oscarella carmela*

*Amphimedon queenslandica*

NP\_001154.2

NP\_796008.2

XP\_001184612.1

NP\_573224.2

NP\_001020996.1

XP\_001629713.1

XP\_002110545.1

g916.t1 (Compagen)

XP\_003388761.1

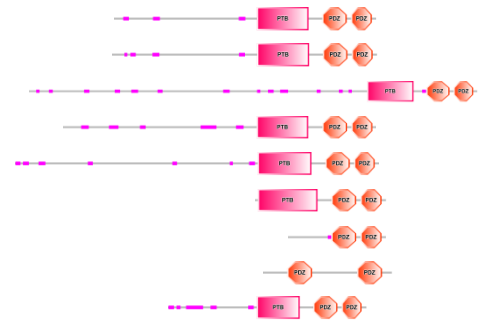

### $\alpha$ -Liprin

*Homo sapiens*

*Mus musculus*

*Strongylocentrotus purpuratus*

*Drosophila melanogaster*

*Caenorhabditis elegans*

*Nematostella vectensis*

*Trichoplax adhaerens*

*Oscarella carmela*

*Amphimedon queenslandica*

NP\_803172.1

NP\_001028491.1

XP\_797637.3

NP\_609067.2

NP\_509768.1

XP\_001641246.1

XP\_002108580

g2065.t1 (Compagen)

XP\_003385618.1

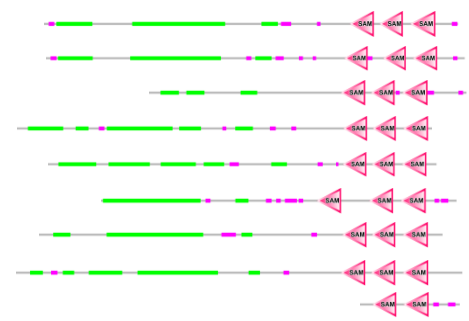

### Erc/Cast

*Homo sapiens*

*Mus musculus*

*Strongylocentrotus purpuratus*

*Drosophila melanogaster*

*Caenorhabditis elegans*

BAC54107.1

Q6PH08.2

XP\_003730089.1

NP\_001097241.2

NP\_500329.1

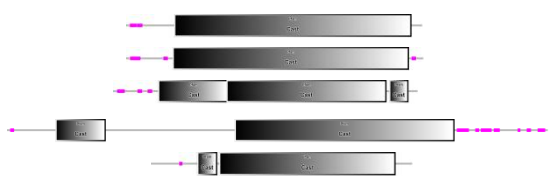

*Nematostella vectensis*  
*Trichoplax adhaerens*  
*Oscarella carmela*

Scaffold 116 (JGI)  
 Scaffold 5 (JGI)  
 g5213.t1 (Compagen)

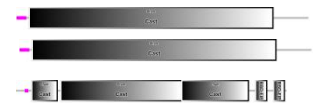

CASK

*Homo sapiens*  
*Mus musculus*  
*Strongylocentrotus purpuratus*  
*Drosophila melanogaster*  
*Caenorhabditis elegans*  
*Nematostella vectensis*  
*Trichoplax adhaerens*

NP\_001119527.1  
 NP\_033936.2  
 XP\_003726866.1  
 NP\_524441.2  
 NP\_001024587.1  
 XP\_001631427.1  
 XP\_002111823.1

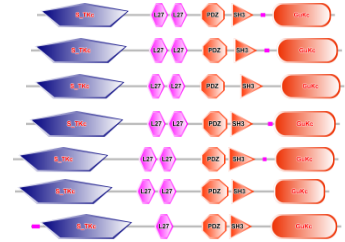

RIM

*Homo sapiens*  
*Mus musculus*  
*Strongylocentrotus purpuratus*  
*Drosophila melanogaster*  
*Caenorhabditis elegans*  
*Nematostella vectensis*  
*Trichoplax adhaerens*

XP\_005248742.1  
 NP\_001012642.1  
 XP\_003724682.1  
 NP\_001014630.2  
 NP\_741831.1  
 Scaffold 54 (JGI)  
 XP\_002114027.1

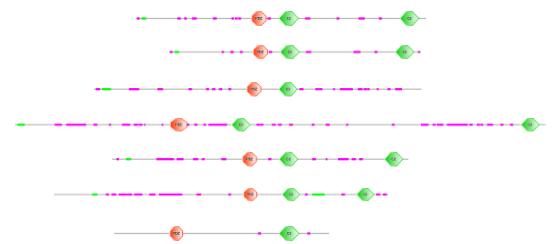

Bassoon

*Homo sapiens*  
*Mus musculus*

NP\_003449.2  
 NP\_031593.2

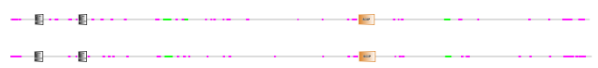

Piccolo

*Homo sapiens*  
*Mus musculus*

NP\_149015.2  
 NP\_036125.4

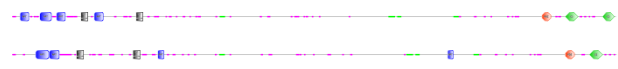

PICK

*Homo sapiens*  
*Mus musculus*  
*Strongylocentrotus purpuratus*  
*Drosophila melanogaster*  
*Caenorhabditis elegans*  
*Nematostella vectensis*  
*Trichoplax adhaerens*  
*Oscarella carmela*  
*Amphimedon queenslandica*  
*Salpingoeca rosetta*  
*Monosiga brevicollis*  
*Capsaspora owczarzaki*

NP\_001034672.1  
 AAH48788.1  
 XP\_788322.1  
 NP\_609582.3  
 NP\_001041046.1  
 XP\_001630160.1  
 XP\_002109696.1  
 g4666.t1 (Compagen)  
 XP\_003385466.1  
 XP\_004993209.1  
 XP\_001747250.1  
 XP\_004365363.1

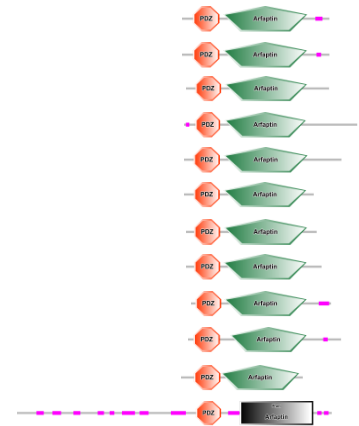

CaMKII

*Homo sapiens*  
*Mus musculus*  
*Strongylocentrotus purpuratus*  
*Drosophila melanogaster*  
*Caenorhabditis elegans*  
*Nematostella vectensis*  
*Trichoplax adhaerens*  
*Oscarella carmela*

NP\_741960.1  
 NP\_803126.1  
 AAQ57276.1  
 NP\_726633.2  
 NP\_001023296.1  
 XP\_001622637.1  
 XP\_002115697.1  
 g4055.t1 (Compagen)

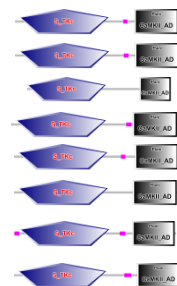

*Amphimedon queenslandica*  
*Salpingoeca rosetta*  
*Monosiga brevicollis*  
*Capsaspora owczarzaki*

XP\_003383392.1  
 XP\_004989001.1  
 XP\_001745863.1  
 XP\_004343000.1

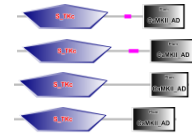

LAR

*Homo sapiens*  
*Mus musculus*  
*Strongylocentrotus purpuratus*  
*Drosophila melanogaster*  
*Caenorhabditis elegans*  
*Nematostella vectensis*  
*Oscarella carmela*  
*Amphimedon queenslandica*  
*Salpingoeca rosetta*  
*Capsaspora owczarzaki*

NP\_569707.2  
 NP\_035343.2  
 XP\_785900.3  
 NP\_523604.2  
 NP\_001021942.1  
 XP\_001635917.1  
 g4996.t1 (Compagen)  
 XP\_003388438.1  
 XP\_004987827.1  
 XP\_004365141.1

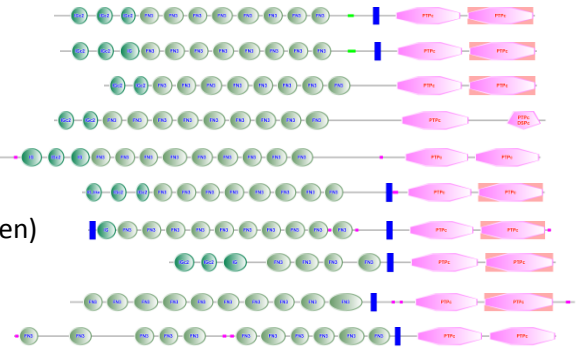

Citron

*Homo sapiens*  
*Mus musculus*  
*Strongylocentrotus purpuratus*  
*Drosophila melanogaster*  
*Caenorhabditis elegans*  
*Nematostella vectensis*  
*Trichoplax adhaerens*  
*Oscarella carmela*  
*Amphimedon queenslandica*  
*Salpingoeca rosetta*  
*Monosiga brevicollis*

NP\_001193928.1  
 NP\_031734.3  
 XP\_001199576.1  
 NP\_648584.1  
 NP\_494921.1  
 XP\_001629741.1  
 XP\_002114488.1  
 g185.t1 (Compagen)  
 XP\_003389466.1  
 XP\_004988028.1  
 XP\_001749073.1

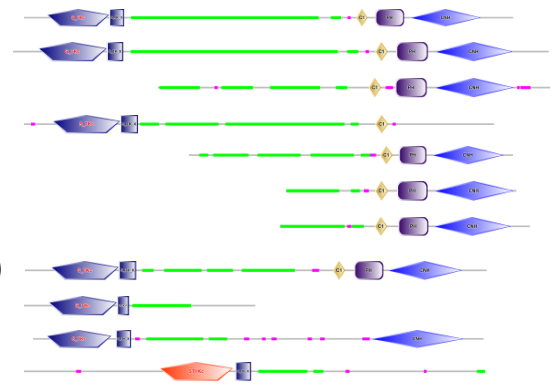

PKCαβγ

*Homo sapiens*  
*Mus musculus*  
*Strongylocentrotus purpuratus*  
*Drosophila melanogaster*  
*Caenorhabditis elegans*  
*Nematostella vectensis*  
*Trichoplax adhaerens*  
*Oscarella carmela*  
*Amphimedon queenslandica*  
*Salpingoeca rosetta*  
*Monosiga brevicollis*

NP\_002730.1  
 NP\_035232.1  
 XP\_001183755.1  
 NP\_725626.1  
 NP\_001123122.1  
 Scaffold 208 (JGI)  
 XP\_002110115.1  
 g10350.t1 (Compagen)  
 XP\_003382766.1  
 XP\_004988458.1  
 XP\_001750627.1

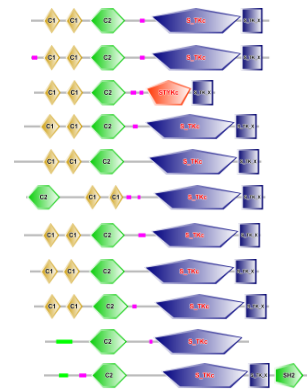

SPAR

*Homo sapiens*  
*Mus musculus*  
*Strongylocentrotus purpuratus*  
*Caenorhabditis elegans*  
*Nematostella vectensis*  
*Oscarella carmela*  
*Amphimedon queenslandica*  
*Salpingoeca rosetta*  
*Monosiga brevicollis*

NP\_056371.1  
 NP\_766167.2  
 XP\_785253.2  
 NP\_505948.2  
 XP\_001635005.1  
 g671.t1 (Compagen)  
 XP\_003387563.1  
 XP\_004988840.1  
 XP\_001743470.1

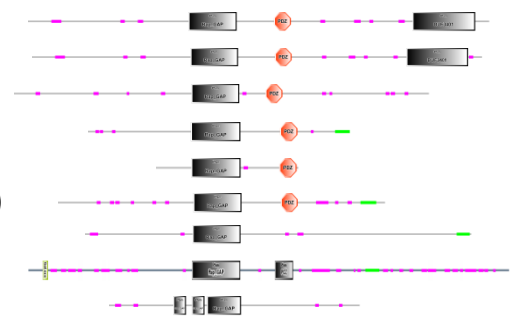

### Ephrin R

*Homo sapiens*

*Mus musculus*

*Strongylocentrotus purpuratus*

*Drosophila melanogaster*

*Caenorhabditis elegans*

*Nematostella vectensis*

*Trichoplax adhaerens*

*Oscarella carmela*

*Amphimedon queenslandica*

NP\_004432.1

NP\_775623.3

XP\_001199846.2

NP\_726591.2

NP\_494807.1

Scaffold 212 (JGI)

XP\_002114653.1

g4793.t1 (Compagen)

XP\_003383547.1

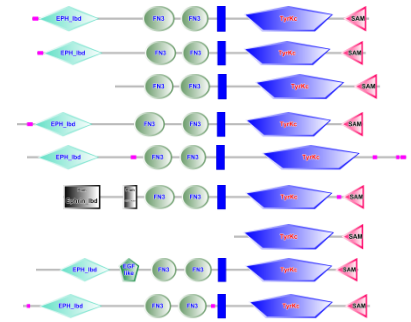

### nNOS

*Homo sapiens*

*Mus musculus*

*Strongylocentrotus purpuratus*

*Drosophila melanogaster*

*Nematostella vectensis*

*Trichoplax adhaerens*

*Oscarella carmela*

*Amphimedon queenslandica*

NP\_000611.1

NP\_032738.1

XP\_003729305.1

NP\_523541.2

XP\_001631503.1

XP\_002116862.1

g2876.t1 (Compagen)

XP\_003384187.1

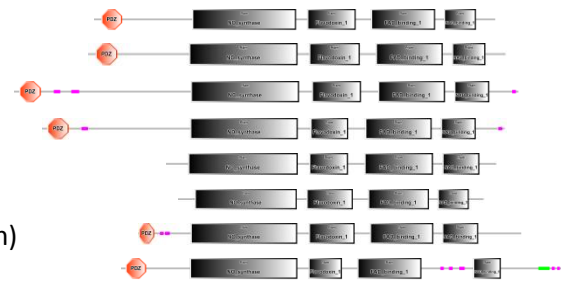

### ErbB R

*Homo sapiens*

*Mus musculus*

*Strongylocentrotus purpuratus*

*Drosophila melanogaster*

*Caenorhabditis elegans*

*Amphimedon queenslandica*

NP\_005219.2

NP\_997538.1

XP\_791361.2

NP\_476759.1

NP\_001129831.1

XP\_003383353.1

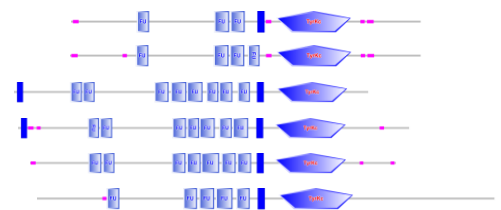

### β-catenin

*Homo sapiens*

*Mus musculus*

*Strongylocentrotus purpuratus*

*Drosophila melanogaster*

*Caenorhabditis elegans*

*Nematostella vectensis*

*Trichoplax adhaerens*

*Oscarella carmela*

*Amphimedon queenslandica*

NP\_001895.1

NP\_031640.1

NP\_001027543.1

NP\_476666.1

NP\_509206.1

XP\_001647518.1

XP\_002110303.1

g9376.t1 (Compagen)

NP\_001266234.1

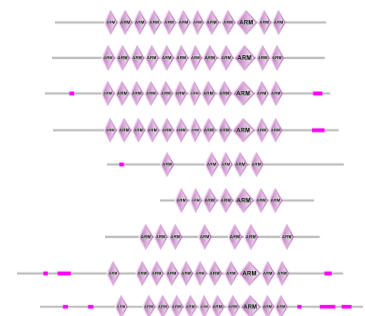

### Neurexin

*Homo sapiens*

*Mus musculus*

*Strongylocentrotus purpuratus*

*Drosophila melanogaster*

*Caenorhabditis elegans*

*Nematostella vectensis*

*Trichoplax adhaerens*

*Oscarella carmela*

NP\_001129131.1

NP\_064648.3

XP\_786974.1

NP\_001163687.1

NP\_502312.2

XP\_001638936.1

XP\_002116615.1

g10488.t1 (Compagen)

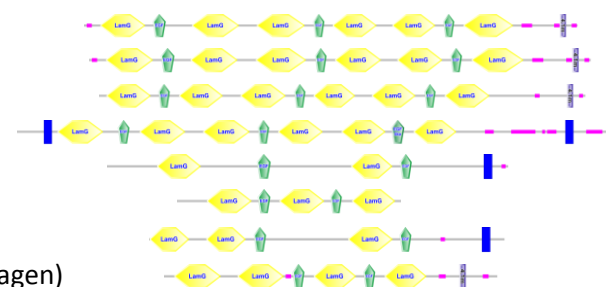

### NCAM

*Homo sapiens*

*Mus musculus*

NP\_851996.2

NP\_001074914.1

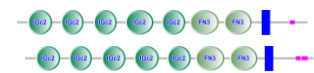



*Strongylocentrotus purpuratus*  
*Drosophila melanogaster*  
*Caenorhabditis elegans*  
*Nematostella vectensis*  
*Trichoplax adhaerens*

XP\_001177682.1  
 NP\_525066.1  
 NP\_741707.3  
 XP\_001635577.1  
 XP\_002115623.1

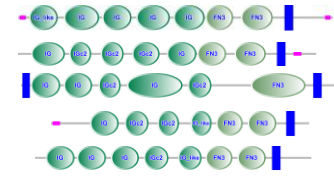

Neurologin

*Homo sapiens*  
*Mus musculus*  
*Strongylocentrotus purpuratus*  
*Drosophila melanogaster*  
*Caenorhabditis elegans*  
*Nematostella vectensis*

NP\_055747.1  
 NP\_001156859.1  
 XP\_001186317.1  
 NP\_523496.1  
 NP\_510283.1  
 XP\_001629673.1

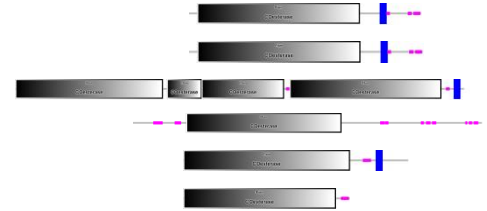

Ephrin-B

*Homo sapiens*  
*Mus musculus*  
*Strongylocentrotus purpuratus*  
*Drosophila melanogaster*  
*Caenorhabditis elegans*  
*Nematostella vectensis*

NP\_004420.1  
 NP\_034240.1  
 XP\_001200001.1  
 NP\_651927.1  
 NP\_501955.2  
 XP\_001628390.1

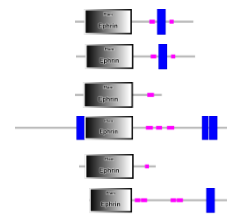

Narp (Pentraxin)

*Homo sapiens*  
*Mus musculus*  
*Nematostella vectensis*

NP\_002513.2  
 NP\_032756.1  
 XP\_001639835.1

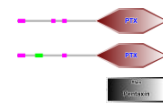

SynCam

*Homo sapiens*  
*Mus musculus*

NP\_055148.3  
 NP\_061240.3

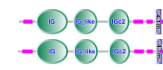

PMCA

*Homo sapiens*  
*Mus musculus*  
*Strongylocentrotus purpuratus*  
*Drosophila melanogaster*  
*Caenorhabditis elegans*  
*Nematostella vectensis*  
*Trichoplax adhaerens*  
*Oscarella carmela*  
*Amphimedon queenslandica*  
*Salpingoeca rosetta*  
*Monosiga brevicollis*  
*Capsaspora owczarzaki*  
*Batrachochytrium dendrobatidis*  
*Saccharomyces cerevisiae*

XP\_005268975.1  
 NP\_080758.1  
 NP\_001028822.1  
 NP\_001014688.3  
 NP\_741352.1  
 XP\_001633838.1  
 XP\_002112839.1  
 8151.t1 (Compagen)  
 XP\_003383693.1  
 XP\_004995346.1  
 XP\_001746980.1  
 XP\_004345268.1  
 EGF79342.1  
 EDN61595.1

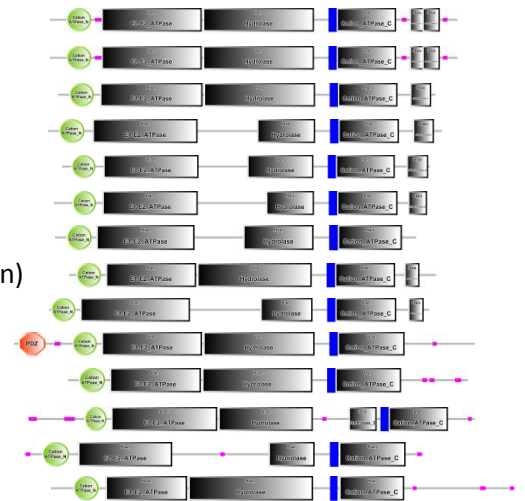

IP3R

*Homo sapiens*  
*Mus musculus*  
*Strongylocentrotus purpuratus*  
*Drosophila melanogaster*  
*Caenorhabditis elegans*

XP\_005265165.1  
 NP\_034715.3  
 XP\_003724127.1  
 NP\_730941.1  
 NP\_001023170.1

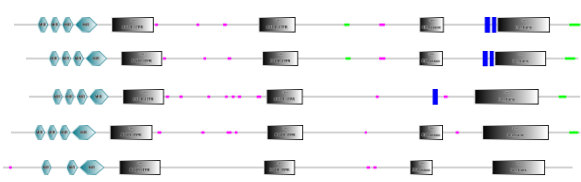

*Nematostella vectensis*  
*Trichoplax adhaerens*  
*Oscarella carmela*  
*Amphimedon queenslandica*  
*Salpingoeca rosetta*  
*Monosiga brevicollis*  
*Capsaspora owczarzaki*

XP\_001629939.1  
 XP\_002112826.1  
 g5722.t1 (Compagen)  
 XP\_003386591.1  
 XP\_004991454.1  
 XP\_001747685.1  
 XP\_004347577.1

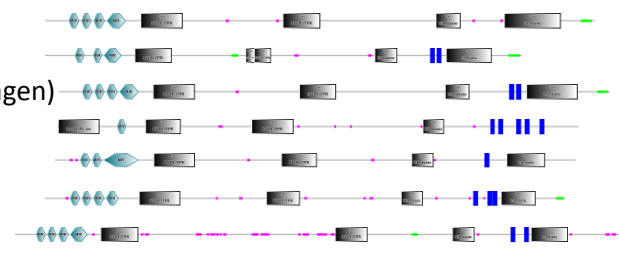

Nav-Channel

*Homo sapiens*  
*Mus musculus*  
*Strongylocentrotus purpuratus*  
*Drosophila melanogaster*  
*Nematostella vectensis*  
*Trichoplax adhaerens*  
*Salpingoeca rosetta*  
*Monosiga brevicollis*

NP\_006505.2  
 NP\_033160.2  
 XP\_001189610.1  
 NP\_001246510.1  
 XP\_001627761.1  
 XP\_002110559.1  
 XP\_004998888.1  
 XP\_001743090.1

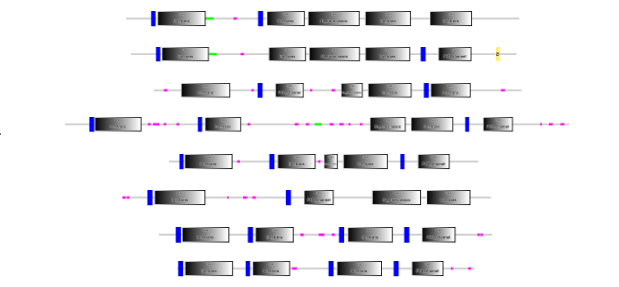

Cav-Channel

*Homo sapiens*  
*Mus musculus*  
*Strongylocentrotus purpuratus*  
*Drosophila melanogaster*  
*Caenorhabditis elegans*  
*Nematostella vectensis*  
*Trichoplax adhaerens*  
*Oscarella carmela*  
*Amphimedon queenslandica*  
*Salpingoeca rosetta*  
*Monosiga brevicollis*  
*Rhizopus oryzae*  
*Saccharomyces cerevisiae*

NP\_001122311.1  
 NP\_083257.2  
 NP\_001118235.1  
 NP\_602305.1  
 NP\_741442.1  
 XP\_001639054.1  
 XP\_002108930.1  
 g4118.t1 (Compagen)  
 XP\_003383036.1  
 XP\_004989719.1  
 XP\_001743090.1  
 EIE92076.1  
 NP\_011733.3

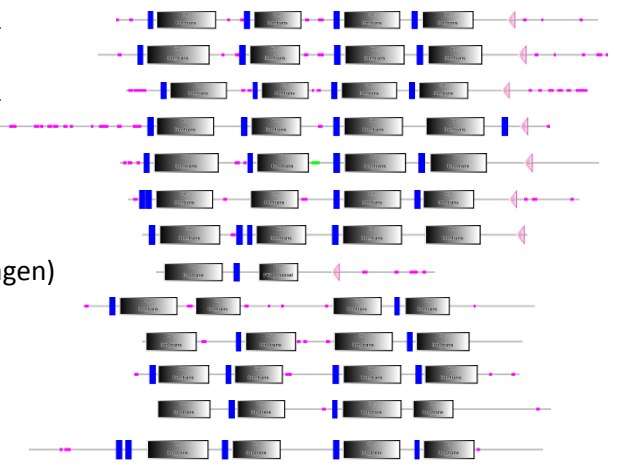

Kv-Channel

*Homo sapiens*  
*Mus musculus*  
*Strongylocentrotus purpuratus*  
*Drosophila melanogaster*  
*Caenorhabditis elegans*  
*Nematostella vectensis*  
*Trichoplax adhaerens*  
*Salpingoeca rosetta*  
*Monosiga brevicollis*  
*Capsaspora owczarzaki*

NP\_000208.2  
 NP\_034725.3  
 XP\_789180.2  
 NP\_728123.1  
 NP\_496104.2  
 XP\_001628953.1  
 XP\_002117304.1  
 XP\_004997201.1  
 XP\_001746676.1  
 XP\_004343602.1

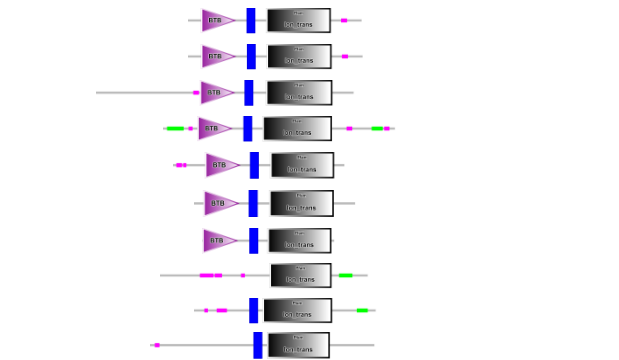

mGluR

*Homo sapiens*  
*Mus musculus*  
*Strongylocentrotus purpuratus*  
*Drosophila melanogaster*  
*Caenorhabditis elegans*  
*Nematostella vectensis*  
*Trichoplax adhaerens*

NP\_001264993.1  
 NP\_058672.1  
 XP\_784936.2  
 NP\_524639.2  
 NP\_509674.1  
 XP\_001633378.1  
 XP\_002112453.1

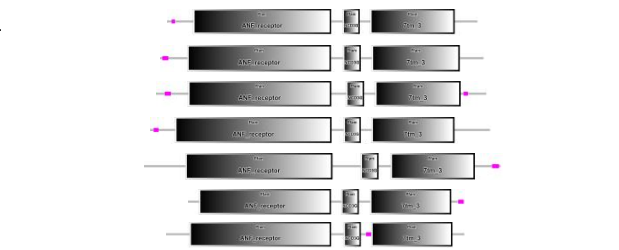

*Oscarella carmela*  
*Amphimedon queenslandica*

g9680.t1 (Compagen)  
 XP\_003388055.1

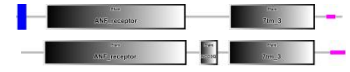

KainateGluR

*Homo sapiens*  
*Mus musculus*  
*Strongylocentrotus purpuratus*  
*Drosophila melanogaster*  
*Caenorhabditis elegans*  
*Nematostella vectensis*  
*Trichoplax adhaerens*  
*Oscarella carmela*

NP\_068775.1  
 AAI31640.1  
 XP\_001178620.1  
 AAM50963.1  
 NP\_741822.2  
 XP\_001622303.1  
 XP\_002111317.1  
 g964.t1 (Compagen)

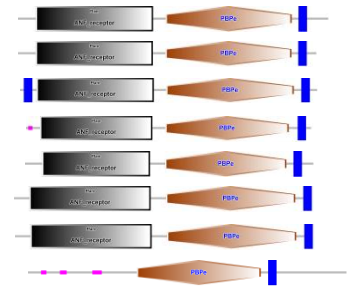

AMPAGluR

*Homo sapiens*  
*Mus musculus*  
*Strongylocentrotus purpuratus*  
*Drosophila melanogaster*  
*Caenorhabditis elegans*  
*Nematostella vectensis*  
*Trichoplax adhaerens*

CAA41491.1  
 AAH56397.1  
 XP\_794826.2  
 NP\_476855.1  
 NP\_498887.2  
 XP\_001622303.1  
 XP\_002117383.1

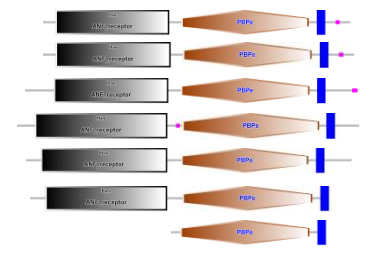

NMDAGluR

*Homo sapiens*  
*Mus musculus*  
*Drosophila melanogaster*  
*Caenorhabditis elegans*  
*Nematostella vectensis*

AAA21180.1  
 AAH39157.1  
 NP\_730940.1  
 NP\_495033.2  
 XP\_001627645.1

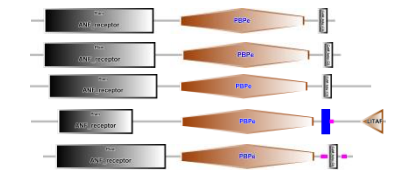

Stargazin

*Homo sapiens*  
*Mus musculus*  
*Strongylocentrotus purpuratus*  
*Drosophila melanogaster*  
*Caenorhabditis elegans*

NP\_006069.1  
 BC103564.1  
 XM\_003726378.1  
 NM\_001031910.1  
 NP\_001021976.1

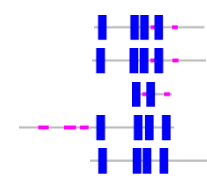

CRIP1

*Homo sapiens*  
*Mus musculus*  
*Strongylocentrotus purpuratus*  
*Drosophila melanogaster*  
*Caenorhabditis elegans*  
*Nematostella vectensis*  
*Trichoplax adhaerens*  
*Oscarella carmela*  
*Amphimedon queenslandica*  
*Salpingoeca rosetta*  
*Monosiga brevicollis*  
*Capsaspora owczarzaki*  
*Rhizopus oryzae*  
*Batrachochytrium dendrobatidis*

NP\_054890.1  
 NP\_064320.1  
 XP\_003730999.1  
 NP\_001097135.1  
 NP\_001032972.1  
 XP\_001625367.1  
 Scaffold 12 (JGI)  
 Scaffold7948 (Compagen)  
 XP\_003387592.1  
 XP\_004996986.1  
 Scaffold 5 (JGI)  
 XP\_004363819.1  
 EIE91262.1  
 EGF84466.1

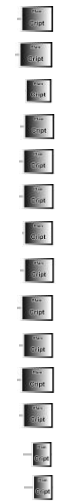

### DLG/PSD-95

*Homo sapiens*

*Mus musculus*

*Strongylocentrotus purpuratus*

*Drosophila melanogaster*

*Caenorhabditis elegans*

*Nematostella vectensis*

*Trichoplax adhaerens*

*Oscarella carmela*

*Amphimedon queenslandica*

*Salpingoeca rosetta*

*Monosiga brevicollis*

*Capsaspora owczarzaki*

XP\_005256549.1

NP\_031890.1

XP\_797198.2

NP\_996404.1

NP\_001024431.1

XP\_001625677.1

XP\_002108800.1

g10425.t1 (Compagen)

XP\_003391362.1

XP\_004997111.1

XP\_001743865.1

XP\_004349749.1

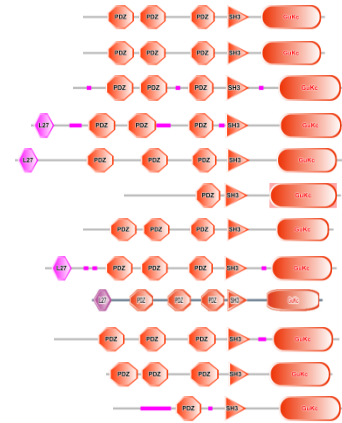

### Homer

*Homo sapiens*

*Mus musculus*

*Strongylocentrotus purpuratus*

*Drosophila melanogaster*

*Nematostella vectensis*

*Trichoplax adhaerens*

*Oscarella carmela*

*Amphimedon queenslandica*

*Salpingoeca rosetta*

*Monosiga brevicollis*

*Capsaspora owczarzaki*

NP\_004263.1

NP\_671705.2

XP\_788792.1

NP\_477396.1

XP\_001637685.1

XP\_002111045.1

g2288.t1 (Compagen)

XP\_003386457.1

XP\_004998981.1

XP\_001743073.1

XP\_004349458.1

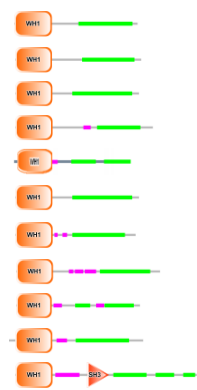

### Shank

*Homo sapiens*

*Mus musculus*

*Strongylocentrotus purpuratus*

*Drosophila melanogaster*

*Caenorhabditis elegans*

*Nematostella vectensis*

*Oscarella carmela*

*Salpingoeca rosetta*

*Monosiga brevicollis*

*Capsaspora owczarzaki*

NP\_036441.2

NP\_001029287.1

XP\_001203175.1

NP\_610925.3

NP\_001022007.1

XP\_001634679.1

g1169.t1 (Compagen)

XP\_004998206.1

XP\_001748613.1

XP\_004364328.1

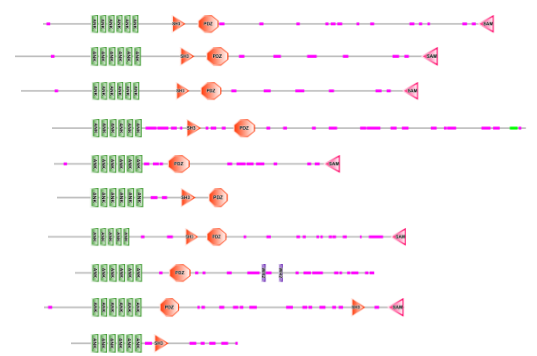

### S-CAM/MAGI

*Homo sapiens*

*Mus musculus*

*Strongylocentrotus purpuratus*

*Drosophila melanogaster*

*Caenorhabditis elegans*

*Nematostella vectensis*

*Trichoplax adhaerens*

*Oscarella carmela*

*Amphimedon queenslandica*

*Salpingoeca rosetta*

*Monosiga brevicollis*

*Capsaspora owczarzaki*

NP\_036433.2

NP\_001164217.1

XP\_001180066.2

NP\_611551.1

NP\_001255577.1

XP\_001634602.1

XP\_002111833.1

g7572.t1 (Compagen)

XP\_003384006.1

XP\_004998452.1

XP\_001748311.1

XP\_004348401.1

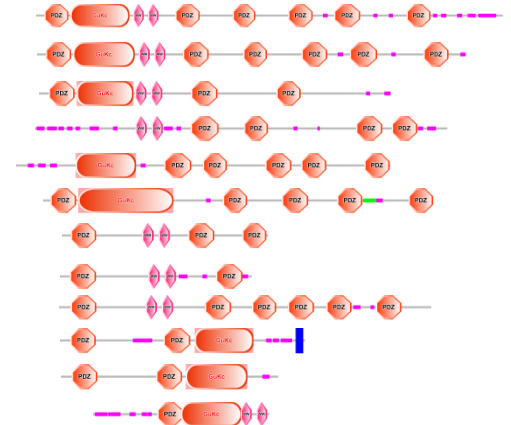

### Velis/Lin-7

*Homo sapiens*

*Mus musculus*

*Strongylocentrotus purpuratus*

*Drosophila melanogaster*

*Caenorhabditis elegans*

*Nematostella vectensis*

*Trichoplax adhaerens*

*Oscarella carmela*

*Amphimedon queenslandica*

*Capsaspora owczarzaki*

NP\_004655.1

NP\_035828.1

XP\_790016.1

NP\_651330.1

NP\_001122664.2

XP\_001639785.1

XP\_002117602.1

g7699.t1 (Compagen)

XP\_003389314.1

XP\_004343811.1

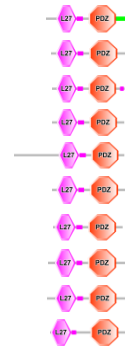

### Preso/FRMPD4

*Homo sapiens*

*Mus musculus*

*Drosophila melanogaster*

*Caenorhabditis elegans*

*Nematostella vectensis*

*Trichoplax adhaerens*

*Oscarella carmela*

*Salpingoeca rosetta*

*Monosiga brevicollis*

NP\_055543.2

NP\_001028502.1

NP\_731964.2

NP\_497672.2

XP\_001632502.1

XP\_002118175.1

m.4788 (Compagen)

XP\_004994899.1

XP\_001747389.1

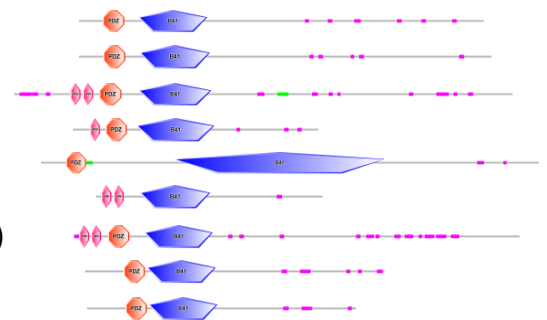

### GKAP

*Homo sapiens*

*Mus musculus*

*Strongylocentrotus purpuratus*

*Drosophila melanogaster*

*Caenorhabditis elegans*

*Nematostella vectensis*

*Trichoplax adhaerens*

*Oscarella carmela*

*Amphimedon queenslandica*

*Salpingoeca rosetta*

*Monosiga brevicollis*

*Capsaspora owczarzaki*

NP\_004737.2

NP\_808307.2

XP\_003724809.1

NP\_524868.1

NP\_498156.1

XP\_001634969.1

XP\_002116625.1

g1853.t1 (Compagen)

XP\_003387885.1

XP\_004992758.1

XP\_001746231.1

XP\_004342856.1

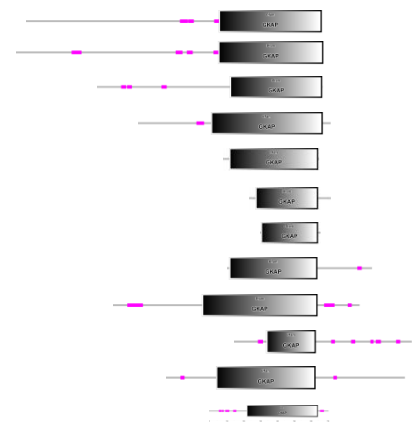

### ras/Rap GTPase-activating protein SynGAP

*Homo sapiens*

*Mus musculus*

*Strongylocentrotus purpuratus*

*Drosophila melanogaster*

*Caenorhabditis elegans*

*Nematostella vectensis*

*Oscarella carmela*

*Amphimedon queenslandica*

*Monosiga brevicollis*

*Salpingoeca rosetta*

NP\_006763.2

NP\_001268420.1

XP\_779967.3

NP\_728095.2

NP\_741873.1

XP\_001627862.1

g1297.t1 (Compagen)

XP\_003389599.1

XP\_001746437.1

XP\_004996548.1

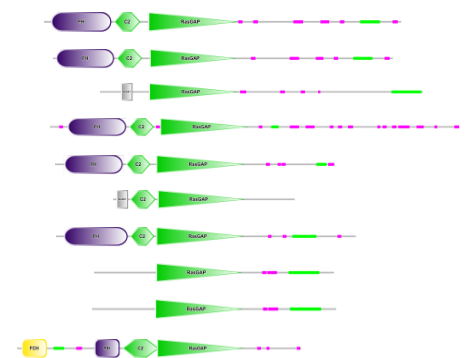

### GRIP1

*Homo sapiens*

*Mus musculus*

*Strongylocentrotus purpuratus*

NP\_066973.2

NP\_083012.1

XP\_003725220.1

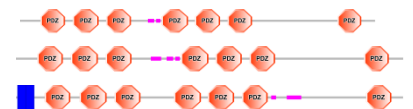

*Drosophila melanogaster*  
*O. carmela*

NP\_572285.2  
g2718.t1 (Compagen)

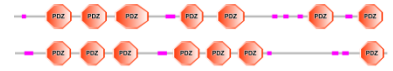

Supplement: supp_msu178_TableS1.pdf [file supp_msu178_TableS1.pdf]
