# Supplementary figures and images for: Evolutionary Insights into Premetazoan Functions of the Neuronal Protein Homer
Source: PubMed Central journal article supplement — Mol Biol Evol. 2014 Jun 3;31(9):2342–55. doi: 10.1093/molbev/msu178 (PMC4137706; doi:10.1093/molbev/msu178), 2014-06-03

Figure S2

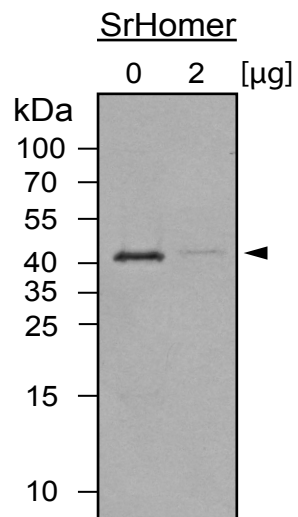

Supplement: supp_msu178_FigureS2.pdf [file supp_msu178_FigureS2.pdf]
